# Supplementary material for: A “modified Obel” method for the severity scoring of (endocrinopathic) equine laminitis
Source: PeerJ. 2019 Jun 7;7:e7084. doi: 10.7717/peerj.7084 (PMC6557244; doi:10.7717/peerj.7084)
Supplement: Supplemental Information 2 [file peerj-07-7084-s002.xlsx]

## Sheet: Reproducibility data
	VIDEO 1							VIDEO 2							VIDEO 3							VIDEO 4							VIDEO 5							VIDEO 6							VIDEO 7
Scorer	Obel Grade	QUT Score	QUT wt shift	QUT Forelimb lift	QUT Walk	QUT Circle	QUT Pulse	Obel Grade	QUT Score	QUT wt shift	QUT Forelimb lift	QUT Walk	QUT Circle	QUT Pulse	Obel Grade	QUT Score	QUT wt shift	QUT Forelimb lift	QUT Walk	QUT Circle	QUT Pulse	Obel Grade	QUT Score	QUT wt shift	QUT Forelimb lift	QUT Walk	QUT Circle	QUT Pulse	Obel Grade	QUT Score	QUT wt shift	QUT Forelimb lift	QUT Walk	QUT Circle	QUT Pulse	Obel Grade	QUT Score	QUT wt shift	QUT Forelimb lift	QUT Walk	QUT Circle	QUT Pulse	Obel Grade	QUT Score	QUT wt shift	QUT Forelimb lift	QUT Walk	QUT Circle	QUT Pulse
Vet 1	3	10	2	1	2	3	2	2	7	2	0	1	2	2	2	6	2	0	1	1	2	3	9	2	1	1	3	2	1	2	0	0	1	1	0	3	10	2	1	2	3	2	3	9	2	1	1	3	2
Vet 2	2	9	2	1	2	2	2	2	7	2	0	1	2	2	1	4	0	0	1	1	2	3	10	2	1	2	3	2	0	0	0	0	0	0	0	3	10	2	1	2	3	2	3	10	2	1	2	3	2
Vet 3	2	6	2	0	1	1	2	1	6	2	0	1	1	2	1	5	2	0	1	0	2	2	8	2	1	1	2	2	0	0	0	0	0	0	0	1	7	2	1	1	1	2	2	7	2	1	1	1	2
Vet 4	2	9	2	0	2	3	2	1	5	2	0	0	1	2	0	2	0	0	0	0	2	1	6	2	0	1	1	2	0	0	0	0	0	0	0	1	8	2	1	1	2	2	2	8	2	0	1	3	2
Vet 5	3	9	2	1	2	2	2	1	5	2	0	0	1	2	1	5	2	0	1	0	2	3	9	2	1	2	2	2	0	1	0	0	0	1	0	2	7	2	1	1	1	2	2	7	2	0	1	2	2
Vet 6	2	7	2	0	1	2	2	1	6	2	0	1	1	2	0	2	0	0	0	0	2	2	8	2	1	1	2	2	0	1	0	0	0	1	0	1	7	2	1	1	1	2	1	8	2	1	1	2	2
Vet 7	3	7	2	1	1	1	2	2	6	2	0	1	1	2	0	3	0	0	1	0	2	2	9	2	1	2	2	2	0	0	0	0	0	0	0	1	7	2	1	1	1	2	3	9	2	1	1	3	2
Vet 8	2	9	2	1	2	2	2	2	7	2	0	1	2	2	1	6	2	0	1	1	2	2	10	2	1	2	3	2	0	1	0	0	0	1	0	2	8	2	1	2	1	2	3	10	2	1	2	3	2
Vet 9	3	11	2	1	3	3	2	1	7	2	0	1	2	2	1	5	2	0	0	1	2	3	11	2	1	3	3	2	0	1	0	0	1	0	0	2	8	2	1	1	2	2	2	7	2	0	1	2	2
Vet 10	3	10	2	1	2	3	2	1	6	2	0	1	1	2	0	5	2	0	1	0	2	1	7	2	0	1	2	2	0	0	0	0	0	0	0	1	6	2	0	1	1	2	1	6	2	0	0	2	2
Vet 11	3	7	2	0	1	2	2	1	5	1	0	1	1	2	1	5	2	0	1	0	2	2	9	2	1	2	2	2	0	0	0	0	0	0	0	2	7	2	1	1	1	2	2	8	2	0	2	2	2
Vet 12	2	9	2	1	2	2	2	1	5	2	0	0	1	2	1	4	2	0	0	0	2	2	8	2	1	1	2	2	0	0	0	0	0	0	0	2	7	2	1	1	1	2	2	7	2	0	1	2	2
Vet 13	2	7	2	0	1	2	2	1	6	2	0	1	1	2	1	6	2	0	1	1	2	2	9	2	1	2	2	2	0	0	0	0	0	0	0	2	7	2	1	1	1	2	2	8	2	1	1	2	2
Vet 14	2	7	2	0	1	2	2	1	7	2	0	1	2	2	1	6	2	0	1	1	2	2	9	2	1	1	3	2	0	0	0	0	0	0	0	1	6	2	0	1	1	2	2	7	2	0	1	2	2
Vet 15	2	7	2	1	1	1	2	1	6	2	0	1	1	2	1	6	2	0	1	1	2	2	7	2	0	1	2	2	0	0	0	0	0	0	0	2	7	2	1	1	1	2	2	8	2	0	1	3	2
Vet 16	3	9	2	1	2	2	2	1	6	2	0	1	1	2	1	6	2	0	1	1	2	2	7	2	0	1	2	2	0	0	0	0	0	0	0	3	9	2	1	2	2	2	3	9	2	1	1	3	2
Vet 17	3	10	2	1	2	3	2	2	7	2	0	1	2	2	1	6	2	0	1	1	2	3	9	2	1	1	3	2	0	1	0	0	0	1	0	2	8	2	1	1	2	2	2	9	2	1	1	3	2
Vet 18	2	7	2	0	1	2	2	1	4	0	0	1	1	2	1	6	2	0	1	1	2	2	8	2	1	1	2	2	0	0	0	0	0	0	0	1	7	2	1	1	1	2	2	7	2	0	1	2	2
Vet 19	2	7	2	0	1	2	2	1	6	2	0	1	1	2	1	5	2	0	1	0	2	1	4	0	0	1	1	2	0	0	0	0	0	0	0	1	4	0	0	1	1	2	2	5	0	0	1	2	2
Vet 20	3	10	2	1	2	3	2	2	7	2	0	1	2	2	2	6	2	0	1	1	2	3	10	2	1	2	3	2	1	2	0	0	1	1	0	2	8	2	1	1	2	2	2	8	2	0	1	3	2
Vet 21	3	11	2	1	3	3	2	1	7	2	0	1	2	2	1	5	2	0	0	1	2	3	11	2	1	3	3	2	0	1	0	0	1	0	0	2	8	2	1	1	2	2	2	7	2	0	1	2	2
Vet 22	2	6	2	0	1	1	2	1	6	2	0	1	1	2	1	5	2	0	1	0	2	2	7	2	1	1	1	2	0	0	0	0	0	0	0	1	5	2	0	1	0	2	1	3	0	0	0	1	2
Vet 23	3	10	2	1	2	3	2	1	6	2	0	1	1	2	1	5	2	0	1	0	2	2	7	2	0	1	2	2	0	0	0	0	0	0	0	2	7	2	1	1	1	2	2	8	2	0	1	3	2
Vet 24	3	9	2	1	2	2	2	1	6	2	0	1	1	2	1	6	2	0	1	1	2	1	5	2	0	0	1	2	0	0	0	0	0	0	0	3	7	2	1	1	1	2	3	7	2	0	1	2	2
Vet 25	3	9	2	1	2	2	2	2	6	2	0	1	1	2	1	6	2	0	1	1	2	3	9	2	1	2	2	2	1	2	0	0	1	1	0	2	7	2	1	1	1	2	2	8	2	1	1	2	2
Vet 26	2	7	2	1	1	1	2	1	6	2	0	1	1	2	1	6	2	0	1	1	2	2	8	2	1	1	2	2	0	0	0	0	0	0	0	2	7	2	1	1	1	2	1	5	2	0	0	1	2
Vet 27	3	7	2	1	2	0	2	2	6	2	0	1	1	2	1	5	2	0	1	0	2	2	7	2	0	1	2	2	1	0	0	0	0	0	0	2	7	2	1	1	1	2	1	6	2	0	0	2	2
Vet 28	3	10	2	1	2	3	2	2	7	2	0	2	1	2	1	6	2	0	1	1	2	3	10	2	1	2	3	2	0	0	0	0	0	0	0	3	12	2	2	3	3	2	2	9	2	0	2	3	2
[truncated: 56 more columns]

## Sheet: Repeatability data
	VIDEO 1 - FIRST SCORE						VIDEO 1 - REPEAT						VIDEO 2 - FRIST SCORE						VIDEO 2 - REPEAT						VIDEO 3 - FIRST SCORE						VIDEO 3 - REPEAT						VIDEO 4 - FIRST SCORE						VIDEO 4 - REPEAT						VIDEO 5 - FIRST SCORE
Scorer	Obel Grade	QUT Score	QUT wt shift	QUT Forelimb lift	QUT Walk	QUT Circle	Obel Grade	QUT Score	QUT wt shift	QUT Forelimb lift	QUT Walk	QUT Circle	Obel Grade	QUT Score	QUT wt shift	QUT Forelimb lift	QUT Walk	QUT Circle	Obel Grade	QUT Score	QUT wt shift	QUT Forelimb lift	QUT Walk	QUT Circle	Obel Grade	QUT Score	QUT wt shift	QUT Forelimb lift	QUT Walk	QUT Circle	Obel Grade	QUT Score	QUT wt shift	QUT Forelimb lift	QUT Walk	QUT Circle	Obel Grade	QUT Score	QUT wt shift	QUT Forelimb lift	QUT Walk	QUT Circle	Obel Grade	QUT Score	QUT wt shift	QUT Forelimb lift	QUT Walk	QUT Circle	Obel Grade
Rater 1	3	8	2	1	2	3	3	8	2	1	2	3	2	5	2	0	1	2	2	5	2	0	1	2	2	4	2	0	1	1	2	4	2	0	1	1	3	7	2	1	1	3	3	7	2	1	1	3	1
Rater 2	2	7	2	1	2	2	2	8	2	1	2	3	2	5	2	0	1	2	2	5	2	0	1	2	1	2	0	0	1	1	1	2	0	0	1	1	3	8	2	1	2	3	3	8	2	1	2	3	0
Rater 3	2	4	2	0	1	1	1	4	2	0	1	1	1	4	2	0	1	1	1	3	2	0	0	1	1	3	2	0	1	0	1	2	2	0	0	0	2	6	2	1	1	2	1	4	2	0	1	1	0
Rater 4	2	5	2	0	1	2	2	6	2	0	2	2	1	4	2	0	1	1	1	5	2	1	1	1	0	0	0	0	0	0	1	4	2	0	1	1	2	6	2	1	1	2	2	5	2	0	1	2	0
Rater 5	3	9	2	1	3	3	3	9	2	1	3	3	1	5	2	0	1	2	1	5	2	0	1	2	1	3	2	0	0	1	1	3	2	0	0	1	3	9	2	1	3	3	3	9	2	1	3	3	0
Rater 6	3	5	2	0	1	2	2	7	2	1	2	2	1	3	1	0	1	1	1	3	2	0	1	0	1	3	2	0	1	0	1	4	2	0	1	1	2	7	2	1	2	2	1	5	2	0	1	2	0
Rater 7	2	7	2	1	2	2	2	7	2	1	2	2	1	3	2	0	0	1	2	4	2	0	1	1	1	2	2	0	0	0	1	3	2	0	1	0	2	6	2	1	1	2	2	6	2	1	1	2	0
Rater 8	2	5	2	0	1	2	3	7	2	1	2	2	1	4	2	0	1	1	2	4	2	0	1	1	1	4	2	0	1	1	1	4	2	0	1	1	2	6	2	0	2	2	3	8	2	2	2	2	0
Rater 9	2	5	2	0	1	2	2	6	2	0	2	2	1	5	2	0	1	2	2	5	2	0	1	2	1	4	2	0	1	1	1	4	2	0	1	1	2	7	2	1	1	3	2	5	2	0	1	2	0
Rater 10	3	8	2	1	2	3	2	6	2	1	1	2	2	5	2	0	1	2	1	4	2	0	1	1	1	4	2	0	1	1	1	4	2	0	1	1	3	7	2	1	1	3	2	6	2	1	1	2	0
Rater 11	2	5	2	0	1	2	2	5	2	1	1	1	1	2	0	0	1	1	1	3	2	0	0	1	1	4	2	0	1	1	0	0	0	0	0	0	2	6	2	1	1	2	2	4	0	1	1	2	0
Rater 12	3	9	2	1	3	3	3	7	2	1	2	2	1	5	2	0	1	2	1	5	2	0	1	2	1	3	2	0	0	1	1	3	2	0	0	1	3	9	2	1	3	3	2	6	2	0	2	2	0
Rater 13	3	8	2	1	2	3	2	7	2	1	2	2	1	4	2	0	1	1	2	5	2	0	1	2	1	3	2	0	1	0	1	4	2	0	1	1	2	5	2	0	1	2	2	5	2	0	1	2	0
Rater 14	3	8	2	1	2	3	2	7	2	0	2	3	2	5	2	0	2	1	2	7	2	1	2	2	1	4	2	0	1	1	1	3	2	0	0	1	3	8	2	1	2	3	2	8	2	1	3	2	0
[truncated: 131 more columns]
