# Supplementary material for: A “modified Obel” method for the severity scoring of (endocrinopathic) equine laminitis
Source: PeerJ journal article supplement (doi:10.7717/peerj.7084), 2019-06-07
Supplement: Supplementary_table_S1.pdf [file Supplementary_table_S1.pdf]

**Supplementary table S1.** Prototype scoring system developed to diagnose laminitis in ponies in an endocrinopathic laminitis induction study (Meier et al., 2018a).

| <b>Order of Assessment</b> | <b>Criteria</b> | <b>Description</b>                               | <b>Possible score</b> |
|----------------------------|-----------------|--------------------------------------------------|-----------------------|
| 1                          | Weight shift    | No weight shifting                               | 0                     |
|                            |                 | Shifting weight between feet at rest             | 1                     |
| 2                          | 30 s foot lift  | Prompt and willingly maintained                  | 0                     |
|                            |                 | Slow and maintained with struggle                | 1                     |
|                            |                 | Unable to maintain lift/resists attempts to lift | 2                     |
| 3                          | Gait at walk    | Normal                                           | 0                     |
|                            |                 | Mild short stilted gait                          | 1                     |
|                            |                 | Moderate or severe short stilted gait            | 2                     |
| 4                          | Gait at trot    | Normal                                           | 0                     |
|                            |                 | Pronounced short stilted trot                    | 1                     |
|                            |                 | Unable to maintain a trot                        | 2                     |
| 5                          | Gait at circle  | Normal                                           | 0                     |
|                            |                 | Head rises when circling towards lame foot       | 1                     |
|                            |                 | Head rises when circling towards both sides      | 2                     |
| 6                          | Movement        | Horse moves willingly                            | 0                     |
|                            |                 | Horse reluctant to move                          | 1                     |
| 7                          | Digital pulse   | Normal - difficult to palpate and not bounding   | 0                     |
|                            |                 | Abnormal - bounding digital pulse on palpation   | 1                     |
| 8                          | Hoof testers    | No response to solar pressure                    | 0                     |
|                            |                 | Positive response to solar pressure              | 1                     |
